# Supplementary material for: Different roles of Ca2+ and chitohexose in peanut (Arachis Hypogaea) photosynthetic responses to PAMP-immunity
Source: PeerJ. 2024 Feb 12;12:e16841. doi: 10.7717/peerj.16841 (PMC10868521; doi:10.7717/peerj.16841)
Supplement: Supplemental Information 1 [file peerj-12-16841-s001.xlsx]

## Sheet: Sheet1
PR-4	Flg22	0	1.0212	0.0352	0.8672	0.0452	PR-10	0	1.0387	0.0351	0.9566	0.0262
		1	1.5262	0.0834	19.6763	3.0867		1	1.5239	0.1563	3.3284	0.843
		2	2.1567	0.8127	20.763	1.2753		2	3.5174	0.3043	3.5853	0.4732
		4	1.2384	0.075	8.5532	1.664		4	1.4772	0.2567	3.4752	0.4863
	Chitohexaose	0	1.0963	0.0566	1.0273	0.0422		0	1.0877	0.0423	0.9574	0.0316
		1	1.2334	0.2798	2.1293	0.4653		1	1.1633	0.267	3.7564	1.021
		2	1.0553	0.2382	2.3832	0.4043		2	0.7556	0.065	4.732	1.2687
		4	2.5534	0.4863	2.4756	0.4563		4	1.9864	0.3943	5.0732	1.1773
PI(abs)	Flg22	0	8.7832	0.2625	9.1767	0.372
		1	9.2564	0.0255	7.8374	0.3453
		2	9.0753	0.373	7.9554	0.3327
		4	8.8453	0.5834	7.9443	0.1899
	Chitohexaose	0	9.563	1.0283	10.0273	1.0144
		1	9.6554	1.1663	9.674	1.5345
		2	9.8453	0.8238	9.0673	0.7431
		4	9.8026	0.5864	9.8632	1.1885
Psb S	Flg22	0	1.0432	0.013	0.9866	0.0213	CP12	0	1.0273	0.0019827	1.073	0.0012983
		1	2.1674	0.4667	1.8973	0.4099		1	0.9057	0.1567	0.491	0.0807
		2	1.263	0.1328	0.5643	0.2026		2	2.2416	0.3027	0.3422	0.1569
		4	2.0672	0.5787	0.8676	0.1753		4	2.0183	0.3287	0.8343	0.2168
	Chitohexaose	0	1.0673	0.0103	1.0294	0.0128		0	1.0182	0.013	1.0129	0.0127
		1	0.1563	0.0098643	0.2123	0.0893		1	0.6573	0.1567	1.3623	0.1565
		2	0.4323	0.0737	0.5523	0.0894		2	0.5123	0.1845	0.8767	0.1654
		4	0.3268	0.105	0.2845	0.0912		4	0.3781	0.1264	0.3756	0.1098
vde	Flg22	0	1.0565	0.0241	0.9965	0.0188	NPQ	0	0.2044	0.0443	0.1365	0.0177
		1	0.6783	0.0765	0.8453	0.1127		1	0.1754	0.0125	0.1224	0.001254
		2	0.4563	0.0342	0.4213	0.0438		2	0.1357	0.0318	0.1077	0.0169
		4	1.0135	0.1563	0.5424	0.0888		4	0.1836	0.0624	0.1135	0.003434
	Chitohexaose	0	1.0072	0.0353	1.0264	0.0167		0	0.1114	0.0123	0.1204	0.0247
		1	2.1898	0.3634	2.4563	0.0977		1	0.1146	0.0057	0.0795	0.0106
		2	1.2553	0.2069	3.0127	0.4267		2	0.1068	0.0302	0.0685	0.0094323
		4	1.3563	0.2654	1.5678	0.153		4	0.0918	0.00985	0.078	0.0124
H2O2	Flg22	0	4.6762	1.1183	5.0673	0.7893
		1	8.3299	0.9187	8.1665	0.363
		2	7.1676	0.5787	7.5456	0.2884
		4	5.0883	0.4634	5.3663	0.3784
	Chitohexaose	0	4.1677	0.2667	4.2677	0.2898
		1	7.0676	0.4878	7.2566	0.8028
		2	7.5124	0.1677	7.7556	0.3852
		4	4.2879	0.0888	4.2874	0.3456
O2-	Flg22	0	201.988	10.6265	186.453	5.763
		1	223.877	9.5673	220.678	6.8873
		2	255.874	39.7856	205.989	9.7784
		4	230.876	15.6563	210.876	3.6764
	Chitohexaose	0	190.668	8.8774	185.627	3.8764
		1	238.677	10.2643	240.457	9.6768
		2	235.878	7.5456	220.677	10.663
		4	228.256	20.9887	213.677	11.6673
